# Supplementary material for: Actors and networks in resource conflict resolution under climate change in rural Kenya
Source: Copernicus journal article supplement (doi:10.5194/esd-7-441-2016), 2016-05-10
Supplement: Supplementary file 1 [file esd-7-441-2016-supplement.pdf]

Supplement of Earth Syst. Dynam., 7, 441–452, 2016  
<http://www.earth-syst-dynam.net/7/441/2016/>  
doi:10.5194/esd-7-441-2016-supplement  
© Author(s) 2016. CC Attribution 3.0 License.

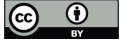

*Supplement of*

## **Actors and networks in resource conflict resolution under climate change in rural Kenya**

**G. W. Ngaruiya and J. Scheffran**

*Correspondence to:* Grace W. Ngaruiya ([ngaruiya.gracew@ku.ac.ke](mailto:ngaruiya.gracew@ku.ac.ke))

The copyright of individual parts of the supplement might differ from the CC-BY 3.0 licence.

List of actors obtained from the interviews who are involved in resource governance in Loitokitok.

| <b>No. ID</b> | <b>Acroymn</b> | <b>Full Name</b>                                                   | <b>Type</b> | <b>Sector</b>      |
|---------------|----------------|--------------------------------------------------------------------|-------------|--------------------|
| 1             | SCAO           | Sub-County Agricultural Office                                     | Public      | Agriculture        |
| 2             | AgriBD         | Agriculture Business Development                                   | Private     | Agriculture        |
| 3             | KenyaSeed      | Kenya Seed Company                                                 | Public      | Agriculture        |
| 4             | NCPb           | National Cereals and Produce Board                                 | Public      | Agriculture        |
| 5             | ENSDA          | Ewaso Nyiro South Development Authority                            | Public      | Social development |
| 6             | KEPHIS         | Kenya Plant Health Inspectorate Service                            | Public      | Agriculture        |
| 7             | TOPServe       | Top Serve Company                                                  | Private     | Agriculture        |
| 8             | Bayer          | Bayer Solutions Kenya                                              | Private     | Agriculture        |
| 9             | AgroSolutions  | Agro-Solutions Limited                                             | Private     | Agriculture        |
| 10            | CityFarming    | City Farming Kenya                                                 | Private     | Agriculture        |
| 11            | Syngenta       | Syngenta Company                                                   | Private     | Agriculture        |
| 12            | EquityBank     | Equity Bank                                                        | Private     | Agriculture        |
| 13            | Mavuno         | Mavuno Limited                                                     | Private     | Agriculture        |
| 14            | SMEP           | Small and Micro Enterprise Programme                               | Private     | Agriculture        |
| 15            | IlkisonkoSacco | Ilkisonko Sacco                                                    | Private     | Agriculture        |
| 16            | AFC            | Agricultural Finance Corporation                                   | Public      | Agriculture        |
| 17            | SCLO           | Sub-County Livestock Officer                                       | Public      | Livestock          |
| 18            | DorcasAid      | Dorcas Aid                                                         | NGO         | Social development |
| 19            | DOREP          | Desert Oasis Residents Empowerment programme                       | Private     | Livestock          |
| 20            | SNV            | Netherlands Development Organisation                               | Private     | Social development |
| 21            | RedCross       | Red Cross                                                          | NGO         | Livestock          |
| 22            | ICPAK          | Intergovernmental Panel on Climate Prediction and Adaptation Kenya | Public      | Livestock          |
| 23            | SACDEP         | Sustainable Agriculture Community Development Programmes           | Private     | Livestock          |
| 24            | ALLPRO         | ASA-Based Livestock and Rural Development Programmes               | Private     | Livestock          |
| 25            | KVaccinePI     | Kenya Vaccine Production Institute                                 | Public      | Livestock          |
| 26            | FG1            | Farmers Groups                                                     | Civic       | Agriculture        |
| 27            | PastG1         | Pastoralists Groups                                                | Civic       | Livestock          |
| 28            | SCKWS          | Sub-County Kenya Wildlife Service Office                           | Public      | Wildlife           |
| 29            | SCKFS          | Sub-County Kenya Forest Service Office                             | Public      | Forestry           |
| 30            | GameScouts     | Game Scouts Association                                            | Civic       | Wildlife           |
| 31            | CouncilElders  | Council of Elders                                                  | Civic       | Social development |
| 32            | Tourists       | Tourists (Domestic & International)                                | Private     | Wildlife           |
| 33            | AWF            | African Wildlife Foundation                                        | Private     | Social development |
| 34            | ATE            | Amboseli Trust for Elephants                                       | Private     | Wildlife           |
| 35            | ACC            | African Conservation Centre                                        | Private     | Social development |
| 36            | ATGRCA         | Amboseli-Tsavo Group Ranches Conservation Association              | Civic       | Wildlife           |
| 37            | HospInv        | Minor hospitality Investors                                        | Private     | Wildlife           |

List of actors obtained from the interviews who are involved in resource governance in Loitokitok.

| <b>No. ID</b> | <b>Acroymn</b>     | <b>Full Name</b>                                       | <b>Type</b> | <b>Sector</b>      |
|---------------|--------------------|--------------------------------------------------------|-------------|--------------------|
| 38            | USAID              | United States Agency for International Development     | Private     | Wildlife           |
| 39            | ParksCanada        | Parks Canada                                           | Private     | Wildlife           |
| 40            | AmboseliSerena     | Amboseli Serena                                        | Private     | Wildlife           |
| 41            | AmboseliSopa       | Amboseli Sopa                                          | Private     | Wildlife           |
| 42            | OltukaiLodge       | Oltukai Lodge                                          | Private     | Wildlife           |
| 43            | TawiLodge          | Tawi Lodge                                             | Private     | Wildlife           |
| 44            | TortilisCamp       | Tortilis Camp                                          | Private     | Wildlife           |
| 45            | PoriniCamp         | Porini Camp                                            | Private     | Wildlife           |
| 46            | CampiKanzi         | Campi ya Kanzi                                         | Private     | Wildlife           |
| 47            | ShompoleLodge      | Shompole Lodge                                         | Private     | Wildlife           |
| 48            | OldonyoWuasLodge   | Oldonyo-Wuas Lodge                                     | Private     | Wildlife           |
| 49            | ChyuluConservancy  | Chyulu Conservancy                                     | Private     | Wildlife           |
| 50            | OlkeriSanctuary    | Olkeri Sanctuary                                       | Private     | Wildlife           |
| 51            | KimanaSanctuary    | Kimana Sanctuary                                       | Private     | Wildlife           |
| 52            | BeadWorkCGs        | Bead-Work Community groups                             | Civic       | Wildlife           |
| 53            | CulturalBsAmboseli | Cultural Bomas in Amboseli                             | Civic       | Wildlife           |
| 54            | WWF                | World Wildlife Fund                                    | Private     | Forestry           |
| 55            | AMREF              | African Medical and Research Foundation                | NGO         | Social development |
| 56            | EnvCGs1            | Environmental Community Groups                         | Civic       | Forestry           |
| 57            | SFS                | School of Field Studies (USA)                          | Private     | Wildlife           |
| 58            | SCWO               | Sub-County Water Office                                | Public      | Water              |
| 59            | WaterPGs1          | Water Project Community Groups                         | Civic       | Water              |
| 60            | WRUA1              | Water Resource users Associations                      | Civic       | Water              |
| 61            | WRMA               | Water Resource Management Authority                    | Public      | Water              |
| 62            | SCIO               | Sub-County Irrigation Office                           | Public      | Water              |
| 63            | LWC                | Loitokitok Water Company                               | Public      | Water              |
| 64            | UNICEF             | United Nations Children's Fund                         | Private     | Water              |
| 65            | SDO                | Social Development Office                              | Public      | Social development |
| 66            | CYEDF              | Constituency Youth Enterprise Development Funds Office | Public      | Social development |
| 67            | YGs1               | Youth Groups                                           | Civic       | Social development |
| 68            | CWEF               | Constituency Women Enterprise Funds Office             | Public      | Social development |
| 69            | WGs1               | Community Water Groups                                 | Civic       | Social development |
| 70            | WelfareCGs         | Welfare Community Groups                               | Civic       | Social development |
| 71            | SelfhelpCGs        | Self-help Community Groups                             | Civic       | Social development |
| 72            | BusinessCGs        | Education Community Groups                             | Civic       | Education          |
| 73            | HerbalistCGs       | Herbalist Association                                  | Civic       | Forestry           |
| 74            | SCG                | Sub-County Government Office                           | Public      | Social development |

List of actors obtained from the interviews who are involved in resource governance in Loitokitok.

| <b>No. ID</b> | <b>Acroymn</b>  | <b>Full Name</b>                                      | <b>Type</b> | <b>Sector</b>      |
|---------------|-----------------|-------------------------------------------------------|-------------|--------------------|
| 75            | FARAJATRUST     | Faraja Trust                                          | NGO         | Social development |
| 76            | PACTKENYA       | Pact Kenya                                            | NGO         | Social development |
| 77            | LEWETKENYA      | Lewet Kenya                                           | NGO         | Social development |
| 78            | NOOMAYIANAT     | Noomayianat                                           | Civic       | Social development |
| 79            | NIA             | NIA organisation                                      | Civic       | Water              |
| 80            | MaasaiLionTrust | Maasai Lion Trust                                     | Private     | Wildlife           |
| 81            | KARI            | Kenya Agricultural Research Institute                 | Public      | Agriculture        |
| 82            | HCDA            | Horticultural Crops Development Authority             | Public      | Agriculture        |
| 83            | Wingsfor Earth  | Wings for Earth                                       | NGO         | Agriculture        |
| 84            | ICIPE           | International Centre of Insect Physiology and Ecology | Private     | Agriculture        |
| 85            | KEFRI           | Kenya Forest Research Institute                       | Public      | Forestry           |
| 86            | AMIRAN          | AMIRAN Kenya Ltd                                      | Private     | Agriculture        |
